# Supplementary material for: Theta-Burst Transcranial Magnetic Stimulation for Posttraumatic Stress Disorder
Source: Atypon-hosted journal article supplement (doi:10.1176/appi.ajp.2019.18101160), 2019-06-24
Supplement: appi.ajp.2019.18101160.ds001.pdf [file appi.ajp.2019.18101160.ds001.pdf]

 


Psychiatry Online
